# THE AMERICAN JOURNAL OF PSYCHIATRY

---

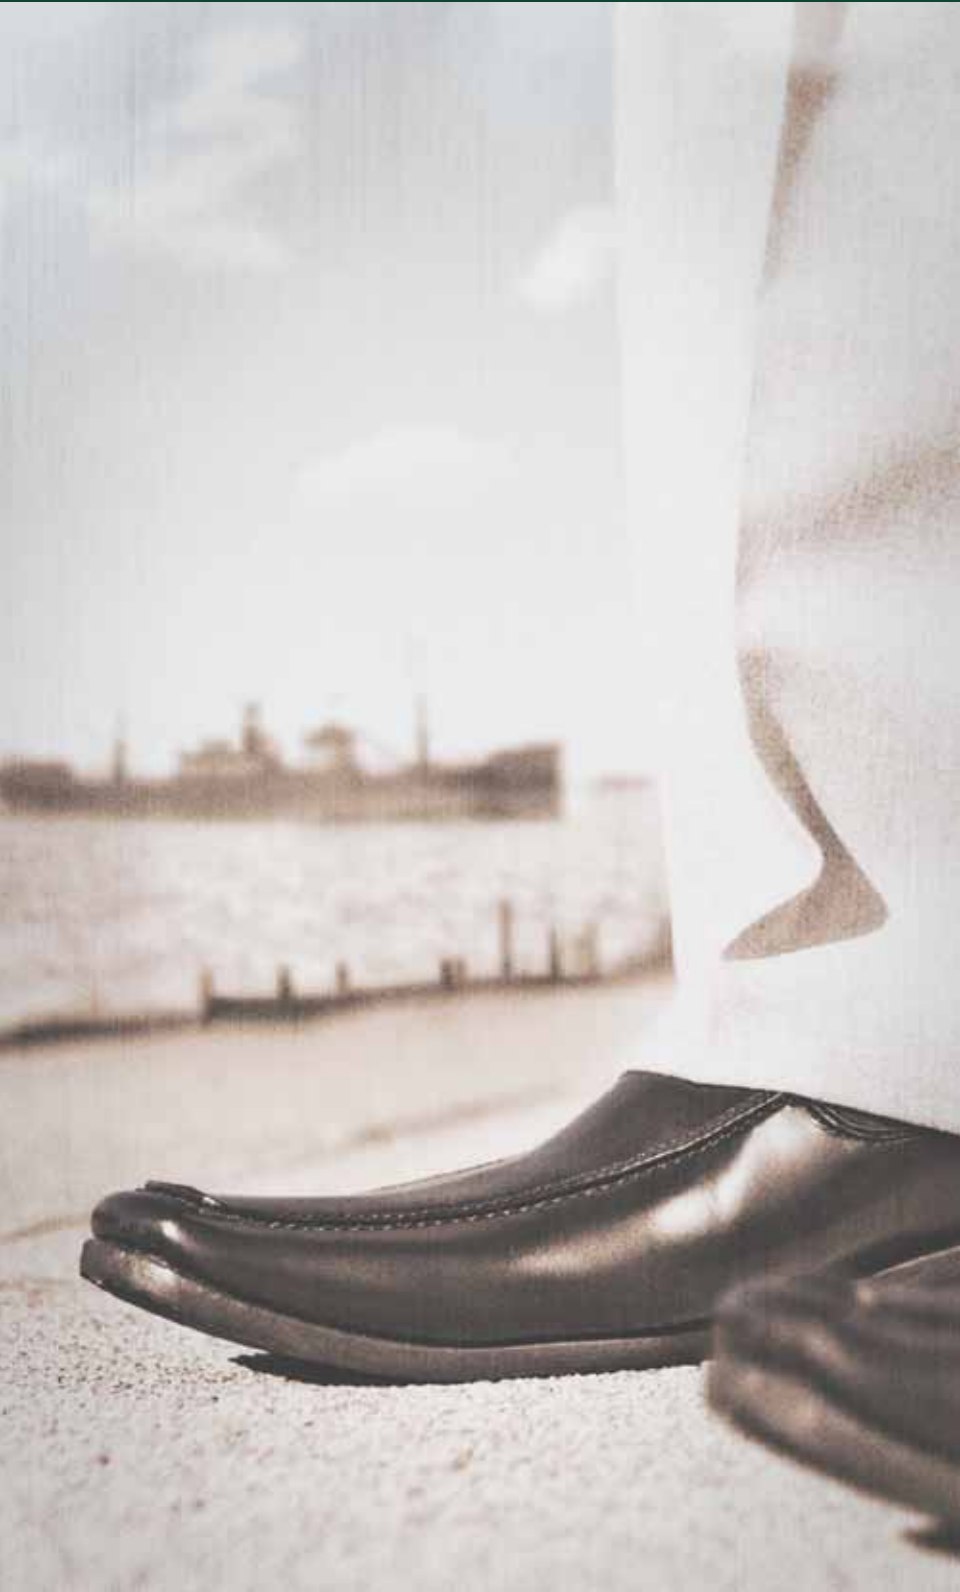

◀ **My Father's Shoes**  
Hochang B. Lee, M.D. 1031

**A Critical Review of the  
First 10 Years of Candidate  
Gene-by-Environment Interaction  
Research in Psychiatry**  
Laramie E. Duncan, Ph.D., and  
Matthew C. Keller, Ph.D. 1041

**Treatment of Suicide Attempters  
With Bipolar Disorder: A  
Randomized Clinical Trial  
Comparing Lithium and  
Valproate in the Prevention of  
Suicidal Behavior**  
Maria A. Oquendo, M.D., et al. 1050

**National Trends in the  
Antipsychotic Treatment of  
Psychiatric Outpatients With  
Anxiety Disorders**  
Jonathan S. Comer, Ph.D., et al. 1057

**Continuing Medical Education** 1127

**October 2011**  
**Volume 168 • Number 10**

---

Official Journal of the  
AMERICAN PSYCHIATRIC ASSOCIATION

---

[ajp.psychiatryonline.org](http://ajp.psychiatryonline.org)
