# The American Journal of PSYCHIATRY

Latest  
IMPACT  
FACTOR  
12.759!

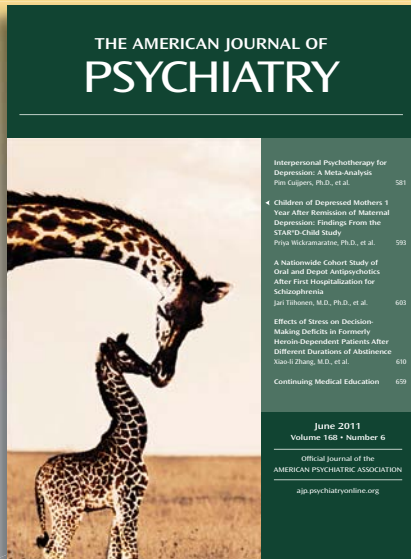

## Official Journal of the American Psychiatric Association

Edited by Robert Freedman, M.D.

- The *American Journal of Psychiatry* has an impact factor of 12.759, a rise from last year's 12.522 and 2-point rise from the previous year's 10.545, according to the recently released 2010 Journal Citation Reports® (Thomson Reuters, 2011), placing it 2nd among the 126 journals in psychiatry journals indexed, while still remaining the far-and-away leader in total citations.
- *The American Journal of Psychiatry* (AJP) is also the #2 journal in psychiatry in terms of immediacy according to Thomson Scientific's Immediacy Index. This important performance metric

is calculated by dividing the number of citations to articles published in a given year by the number of articles published in that year.

- The Immediacy Index is a good measure of how quickly a given journal's articles are cited—AJP's #2 placement is a result of publishing articles that are relevant, covering current "hot" topics and cutting-edge research, and getting these findings to the field faster with AJP in Advance, the Journal's online-ahead-of-print publication protocol.
- A recent poll conducted by the BioMedical & Life Sciences Division of The Special Libraries Association identified the 100 most influential journals in all of Biology & Medicine over the last 100 years. *The American Journal of Psychiatry* was among those honored, the only psychiatry/psychology journal represented.

No other psychiatric journal reaches more psychiatrists with greater impact or immediacy than the journal that the overwhelming majority of psychiatrists considers essential: AJP.

ISSN 0002-953X      [ajp.psychiatryonline.org](http://ajp.psychiatryonline.org)

To order a subscription, visit [www.appi.org](http://www.appi.org).

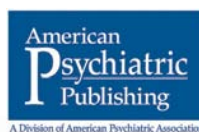

The First and Last Word in Psychiatry

[www.appi.org](http://www.appi.org) • 1-800-368-5777 • 703-907-7322

Find us on [facebook](https://www.facebook.com/ajp) and [twitter](https://twitter.com/ajp)      Priority Code AH1132

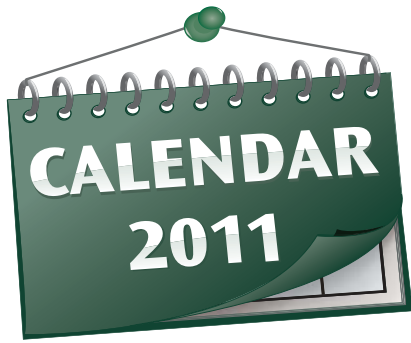

*For free listing of your organization's official annual or regional meeting, please send us the following information: sponsor, location, inclusive dates, type and number of continuing education credits (if available), and the name, address, and telephone number of the person or group to contact for more information. In order for an event to appear in our listing, all notices and changes must be received at least 6 months in advance of the meeting and should be addressed to:*

**Calendar, American Journal of Psychiatry, 1000 Wilson Boulevard, Suite 1825, Arlington, VA 22209-3901, [swestate@psych.org](mailto:swestate@psych.org) (e-mail).**

*Because of space limitations, only listings of meetings of the greatest interest to Journal readers will be included.*

---

## OCTOBER

**October 5–8**, II International Congress, Dual Disorders, Addictive Behaviors and other Mental Disorders, Barcelona, Spain. Contact: SEPD, [www.cipd2011.com](http://www.cipd2011.com) (web site).

**October 18–23**, 58th Annual Meeting, American Academy of Child and Adolescent Psychiatry, Toronto, Ontario. Contact: AACAP, 3615 Wisconsin Avenue, N.W., Washington, DC 20016-3007; (202) 966-7300 (tel), (202) 966-2891 (fax), [meetings@aacap.org](mailto:meetings@aacap.org) (e-mail), [www.aacap.org](http://www.aacap.org) (web site).

**October 27–30**, 63rd Institute on Psychiatric Services, American Psychiatric Association, San Francisco, CA. Contact: APA Annual Meetings Dept., 1000 Wilson Blvd., Ste. 1825, Arlington, VA 22209; (703) 907-7815.

---

## NOVEMBER

**November 1–December 5**, Poster submissions open for May 2012 Annual Meeting of the American Psychiatric Association.

---

## DECEMBER

**December 4–8**, 50th Annual Meeting, American College of Neuropsychopharmacology, Waikaloa Beach, Hawaii.

Contact: [acnp@acnp.org](mailto:acnp@acnp.org); (615) 324-2360.

---

## MARCH 2012

**March 21–24**, 23rd Annual Meeting, American Neuropsychiatric Association, New Orleans, La. Contact: (614) 447-2077 or visit [www.anpaonline.org](http://www.anpaonline.org) (web site).

---

## APRIL 2012

**April 22–25**, Annual Meeting of the North American Society for Psychosocial Obstetrics and Gynecology (NASPOG), Providence, R.I. Contact: NASPOG National Office, 8213 Lakenheath Way, Potomac, MD 20854; (301) 983-6282 (tel); [info@naspog.org](mailto:info@naspog.org) (email); [www.naspog.org](http://www.naspog.org) (web site).

---

## MAY 2012

**May 3–5**, 56th Annual Meeting, American Academy of Psychoanalysis and Dynamic Psychiatry, Philadelphia, Pa. Contact: Executive Office, AAPDP, PO Box 30, Bloomfield, CT 06002; (888) 691-8281 (tel), (860) 286-0787 (fax), [info@aapdp.org](mailto:info@aapdp.org) (e-mail), [www.aapdp.org](http://www.aapdp.org) (web site).

**May 5–9**, 165th Annual Meeting, American Psychiatric Association, Philadelphia, Pa. Contact: APA Annual Meetings Dept., 1000 Wilson Blvd., Ste. 1825, Arlington, VA 22209; (703) 907-7815.

Contact: APA Annual Meetings Dept., 1000 Wilson Blvd., Ste. 1825, Arlington, VA 22209; (703) 907-7815.

---

## JUNE 2012

**June 23–27**, Joint Organizational Meeting of the Organization of Teratology Information Specialists, the Teratology Society, and the Neurobehavioral Teratology Society, Baltimore, Md. Contact: Ms. Dee Quinn, University of Arizona, Drachman Hall, PO Box 210202, 1295 N. Martin, Room B308, Tucson, AZ 85721-0202; (520) 626-3547 (tel); [www.otispregnancy.org](http://www.otispregnancy.org); [www.teratology.org](http://www.teratology.org); [www.nbts.org](http://www.nbts.org).

---

## OCTOBER 2012

**October 3–5**, International Biennial Congress of the Marcé Society (International Society for the Understanding, Prevention and Treatment of Mental Illness Related to Childbearing), in collaboration with the Société Marcé Francophone, Paris, France (conducted in English). Contact: Ms. Nicole Greer, 5034-A Thoroughbred Lane, Brentwood, TN 37027 USA; (615) 324-2362 (tel); [info@marcesociety.com](mailto:info@marcesociety.com) (email); [www.marcesociety.com](http://www.marcesociety.com) (web site).

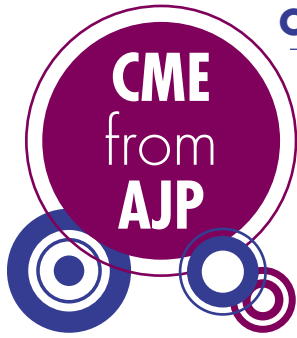

## Continuing Medical Education

Three articles in this issue form the basis of a short course with questions that can be answered for up to 1 *AMA PRA Category 1 Credit™* each by visiting <http://cme.psychiatryonline.org/> and clicking on “American Journal of Psychiatry CME.”

CME credit is issued only online, and a paid subscription to the AJP CME course program is required.

This month's courses appear on pages 1127–1130.

FREE AUDIO!

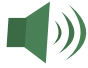

## Have You Heard?

You can listen to highlights of *The American Journal of Psychiatry* by downloading a monthly free .mp3 audio file from our web site (<http://ajp.psychiatryonline.org/misc/audio.dtl>) or by subscribing to the AJP Audio podcast at iTunes or other feed reader. Presented by Deputy Editor Dr. Susan Schultz or by Executive Editor Michael Roy, each month's audio lasts approximately 30 minutes and covers several research articles, the Treatment in Psychiatry feature, and one or two editorials.

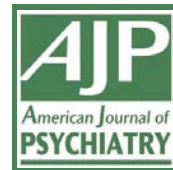

Coming in the November 2011 issue\*

## THE AMERICAN JOURNAL OF PSYCHIATRY

### Childhood Trajectories of Inattention and Hyperactivity and Prediction of Educational Attainment in Early Adulthood: A 16-Year Longitudinal Population-Based Study

J.-B. Pingault, R.E. Tremblay, F. Vitaro, R. Carbonneau, C. Genolini, B. Falissard, and S.M. Côté

### Budget Impact and Sustainability of Medical Care Management for Persons With Serious Mental Illnesses

B.G. Druss, S.A. von Esenwein, M.T. Compton, L. Zhao, and D.L. Leslie

### Episodes of Mood Disorders in 2,252 Pregnancies and Postpartum Periods

A.C. Viguera, L. Tondo, A.E. Koukopoulos, D. Reginaldi, B. Lepri, and R.J. Baldessarini

### Diagnostic Shifts During the Decade Following First Admission for Psychosis

E.J. Bromet, R. Kotov, L.J. Fochtmann, G.A. Carlson, M. Tanenberg-Karant, C. Ruggero, and S. Chang

\*Can't wait? Visit [ajp.psychiatryonline.org](http://ajp.psychiatryonline.org) and click the “AJP in Advance” logo to see all articles uploaded in advance of print!

# The Residents' JOURNAL

## The Residents' JOURNAL

a publication of  
The American Journal of Psychiatry

September 2011

Volume 6

Issue 9

### Inside

- 1 In This Issue
- 2 The Role of Psychiatry in Events Such as 9/11  
Sarah M. Fayad, M.D.
- 3 A Resident's Guide to Buprenorphine  
Jonathan Avery, M.D.
- 6 Obesity and Addiction  
Maria Andrea Baez, M.D.
- 7 Should Ecstasy Be Used Therapeutically?  
Jay Augsburger, M.D.;  
Jonathan Avery, M.D.
- 8 Ethics and Medical Abandonment in a Rehabilitation Facility  
Kedar Kirtane, B.S.,  
Jennifer Sbicca, B.S.
- 9 Physician Suicide: A Brief Review  
Dawn Flosnik, M.D.
- 10 Co-Occurring Eating, Borderline Personality, and Substance Use Disorders  
Maria Levine, M.D.
- 11 Mood Disorders in Women: A Focus on Premenstrual Dysphoric Disorder  
Carolyn A. Broudy, M.D.
- 14 Test Your Knowledge
- 15 Residents' Journal Info

### In This Issue

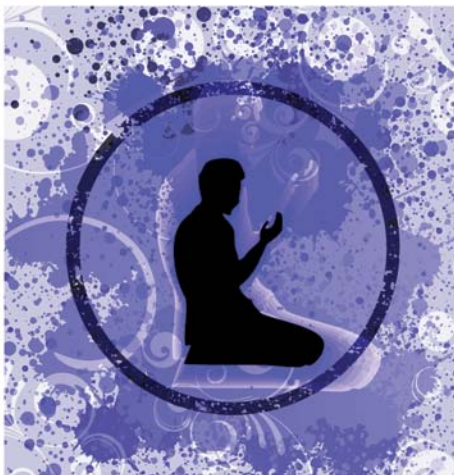

Editor-in-Chief  
Sarah M. Fayad, M.D.  
Senior Editor  
Joseph M. Cerimele, M.D.  
Associate Editor  
Monifa Seawell, M.D.

Editors Emeriti  
Sarah B. Johnson, M.D.  
Molly McVay, M.D.  
Guest Section Editor  
Jonathan Avery, M.D.  
Staff Editor  
Angela Moore

The Residents' Journal accepts manuscripts authored by medical students, resident physicians, and fellows. To submit your paper, please visit the manuscript submission site at [mc.manuscriptcentral.com/appi-ajp](http://mc.manuscriptcentral.com/appi-ajp) and either create an account or use your existing account. For manuscript type, select "Residents." Then follow the instructions to upload your manuscript. Residents who are interested in participating as Guest Section Editors should e-mail the Residents' Journal Editor-in-Chief Sarah M. Fayad at [fayad@ufl.edu](mailto:fayad@ufl.edu).

See the September 2010 issue for details on the new peer review process.

The Residents' Journal is sent free-of-charge to all psychiatry residents. Anyone interested in being included on the distribution list should contact Angela Moore, the Residents' Journal staff editor at [ajp@psych.org](mailto:ajp@psych.org) with "Subscribe to Residents' Journal" in the subject line.

**Upcoming Issue Themes**  
November: Autistic Disorders

To access the complete Residents' Journal archives, visit [ajp.psychiatryonline.org/misc/Residents\\_Journal.dtl](http://ajp.psychiatryonline.org/misc/Residents_Journal.dtl)

# get CME from AJP

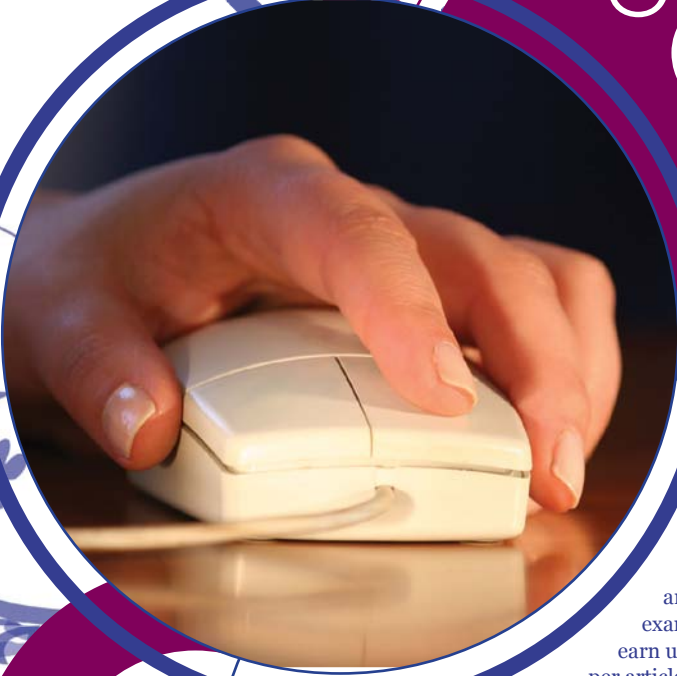

Brief companion exams are created for three of the most influential articles from each issue. By reading the articles and completing the online exams, you can test your knowledge and earn up to 1 *AMA PRA Category 1 Credit™* per article. Correct answers are highlighted for your reference upon completion of the course. A link from the question to the correct answer in context will also be highlighted in the associated article, thus extending the learning experience.

CME credit is only provided online, and a subscription to the AJP CME program is required. From the moment you subscribe to the AJP CME program, you will be able to select from 72 courses from among 40 possible subject areas. You'll also be able to access the next 33 courses as they become available. For more information and pricing, please go to <http://cme.psychiatryonline.org/misc/aboutajpcme.shtml>

This activity is sponsored by the American Psychiatric Association. The American Psychiatric Association is accredited by the Accreditation Council for Continuing Medical Education to provide continuing medical education for physicians. The American Psychiatric Association designates each educational activity for a maximum of 1 *AMA PRA Category 1 Credit™*. Physicians should only claim credit commensurate with the extent of their participation in the activity.

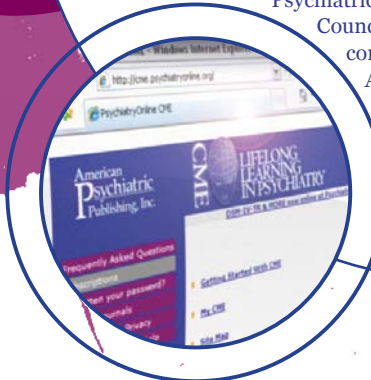

Fulfill your CME requirement while staying current on the latest advances in psychiatry.  
Subscribe to AJP CME!

## Contents

- A13 Editorial Board  
A15 Highlights of this issue

## Editorials

- 263 **No psychiatry without psychopharmacology**  
P. J. Harrison, D. S. Baldwin, T. R. E. Barnes, T. Burns,  
K. P. Ebmeier, I. N. Ferrier and D. J. Nutt
- 266 **The rise and fall of the atypical antipsychotics**  
T. Kendall
- 269 **Are all antipsychotic drugs the same?**  
S. Leucht and J. M. Davis

- 271 **Rosiglitazone and Other Bitter Pills – poems by doctors**  
Bob Adams

- 272 **Unipolar and bipolar depression: different or the same?**  
D. J. Smith and N. Craddock

- 274 **Yukio Mishima – extra**  
Martin Humphreys, Henry Scott Stokes

## Review article

- 275 **Time course of improvement with antipsychotic medication in treatment-resistant schizophrenia**  
T. Suzuki, G. Remington, T. Arenovich, H. Uchida, O. Agid,  
A. Graff-Guerrero and D. C. Mamo

## Papers

- 281 **Clozapine v. chlorpromazine in treatment-naive, first-episode schizophrenia: 9-year outcomes of a randomised clinical trial**  
R. R. Girgis, M. R. Phillips, X. Li, K. Li, H. Jiang, C. Wu, N. Duan,  
Y. Niu and J. A. Lieberman
- 288 **Reading for Well-Being Project – 100 words**  
David Fearnley
- 289 **Safety of antipsychotics in people with intellectual disability**  
V. Frighi, M. T. Stephenson, A. Morovat, I. E. Jolley, M. Trivella,  
C. A. Dudley, E. Anand, S. J. White, C. V. Hammond, R. A. Hockney,  
B. Barrow, R. Shakir and G. M. Goodwin
- 296 **Course of auditory vocal hallucinations in childhood: 5-year follow-up study**  
A. A. Bartels-Velthuis, G. van de Willige, J. A. Jenner, J. van Os  
and D. Wiersma
- 303 **Comparison of depressive episodes in bipolar disorder and in major depressive disorder within bipolar disorder pedigrees**  
P. B. Mitchell, A. Frankland, D. Hadzi-Pavlovic, G. Roberts,  
J. Corry, A. Wright, C. K. Loo and M. Breakspear
- 310 **Problem-solving therapy for people who present to hospital with self-harm: Zelen randomised controlled trial**  
S. Hatcher, C. Sharon, V. Parag and N. Collins

- 317 **Rumination-focused cognitive-behavioural therapy for residual depression: phase II randomised controlled trial**  
E. R. Watkins, E. Mullan, J. Wingrove, K. Rimes, H. Steiner,  
N. Bathurst, R. Eastman and J. Scott
- 323 **Premorbid risk markers for chronic fatigue syndrome in the 1958 British birth cohort**  
C. Clark, L. Goodwin, S. A. Stansfeld, M. Hotopf and P. D. White
- 330 **Premarital mental disorders and physical violence in marriage: cross-national study of married couples**  
E. Miller, J. Breslau, M. Petukhova, J. Fayyad, J. Greif Green,  
L. Kola, S. Seedat, D. J. Stein, A. Tsang, M. C. Viana, L. H. Andrade,  
K. Demyttenaere, G. de Girolamo, J. M. Haro, C. Hu, E. G. Karam,  
V. Kovess-Masfety, T. Tomov and R. C. Kessler

## Short report

- 338 **Pre-conception inter-pregnancy interval and risk of schizophrenia**  
L. Gunawardana, G. D. Smith, S. Zammit, E. Whitley,  
D. Gunnell, S. Lewis and F. Rasmussen

## Columns

- 340 **Correspondence**  
343 **Corrections**  
344 **Book reviews**  
348 **Contents of *Advances in Psychiatric Treatment***  
349 **Contents of the *American Journal of Psychiatry***  
350 **From the Editor's desk**

## Cover picture

*Drawing produced under the influence of hashish (pen & ink on paper). Jean-Martin Charcot (1825–1893).*

Jean-Martin Charcot was an eminent French neurologist, who is credited with delineating such conditions as disseminated sclerosis, amyotrophic lateral sclerosis (Charcot's disease) and locomotor ataxia. He is best known to a psychiatric audience for his work on hypnosis and hysteria, which, though now largely discredited, earned Charcot, in his day, the sobriquet, 'Napoleon of the neuroses'. His clinical lectures at the Salpêtrière Hospital in Paris were highly popular and were attended by Sigmund Freud, who drew on Charcot's ideas when developing his own theory of hysteria. In 1853, when Charcot was a medical student, he took hashish, which was in vogue in certain Bohemian and artistic circles in Paris during this period. He experienced 'a tumult of phantasmagoric visions' which he tried to capture in this sketch. Charcot was, in fact, a gifted draughtsman and took a great interest in the arts. He drew sketches of his patients and used photographs to illustrate clinical conditions.

From *High Society: Mind-altering Drugs in History and Culture* by Mike Jay, London: Thames and Hudson, 2010. Published on the occasion of the exhibition of the same name, held at the Wellcome Collection, London, 11 November 2010 to 27 February 2011. For more on Charcot, see *The Discovery of the Unconscious: The History and Evolution of Dynamic Psychiatry* by Henri F. Ellenberger (Basic Books, 1970).

Courtesy: Hôpital de la Salpêtrière, Paris, France/Archives Charmet/The Bridgeman Art Library.

We are always looking for interesting and visually appealing images for the cover of the *Journal* and would welcome suggestions or pictures, which should be sent to Dr Allan Beveridge, British Journal of Psychiatry, 17 Belgrave Square, London SW1X 8PG, UK or [bjp@rcpsych.ac.uk](mailto:bjp@rcpsych.ac.uk).
